# Supplementary material
Source: PubMed Central journal article supplement (PMC7165727)
Supplement: HUMU-29-306-s001.pdf [file HUMU-29-306-s001.pdf]

## SUPPLEMENTARY MATERIALS

### Supplementary Tables S1 and S2

### Supplementary Figure S1

**SUPPLEMENTARY TABLE S1. Information of the 11 mutations detected by ASPUA**

| Gene and GenBank Accession | Nucleotide change | Amino acid change |
|----------------------------|-------------------|-------------------|
| GJB2<br>NM_004004.4        | c.35delG          | Frameshift        |
|                            | c.167delT         | Frameshift        |
|                            | c.176_191del16    | Frameshift        |
|                            | c.235delC         | Frameshift        |
|                            | c.299_300delAT    | Frameshift        |
| GJB3<br>NM_024009.2        | c.538C>T          | p.Arg180X         |
|                            | c.547G>A          | p.Glu183Lys       |
| SLC26A4<br>NM_000441.1     | c.707T>C          | p.Leu236 Pro      |
|                            | c.2168A>G         | p.His723Arg       |
|                            | c.919-2A>G        | Splice acceptor   |
| MTRNR1<br>NC_001807.4      | m.1555A>G         | —                 |

Nucleotide +1 in the cDNA reference sequence is the A of the ATG translation initiation codon.

**SUPPLEMENTARY TABLE S2. The clinical information of the patient samples**

| <b>Gene</b>  | <b>Mutation<sup>a</sup></b>         | <b>Clinical information</b> | <b>Number of subjects</b> |
|--------------|-------------------------------------|-----------------------------|---------------------------|
| GJB2         | c.35delG hom                        | deaf                        | 14                        |
| GJB2         | c.35delG het                        | carriers                    | 4                         |
| GJB2         | c.35delG het                        | deaf                        | 9                         |
| GJB2         | c.35delG/c.299_300delAT             | deaf                        | 1                         |
| GJB2         | c.35delG/c.167delT                  | deaf                        | 2                         |
| GJB2         | c.167delT hom                       | deaf                        | 5                         |
| GJB2         | c.167delT het                       | carriers                    | 5                         |
| GJB2         | c.167delT het                       | deaf                        | 1                         |
| GJB2         | c.176_191del16 hom                  | deaf                        | 2                         |
| GJB2         | c.176_191del16 het                  | deaf                        | 3                         |
| GJB2         | c.235delC/c.176_191del16            | deaf                        | 6                         |
| GJB2         | c.235delC hom                       | deaf                        | 11                        |
| GJB2         | c.235delC het                       | deaf                        | 5                         |
| GJB2         | c.235delC/c.299_300delAT            | deaf                        | 3                         |
| GJB2         | c.299_300delAT hom                  | deaf                        | 3                         |
| GJB2         | c.299_300delAT het                  | deaf                        | 4                         |
| GJB3         | c.538C>T (p.Arg180X) het            | deaf                        | 6                         |
| GJB3         | c.547G>A (p.Glu183Lys) het          | deaf                        | 9                         |
| SLC26A4      | c.707T>C (p.Leu236Pro) het          | deaf                        | 1                         |
| SLC26A4      | c.919-2A>G hom                      | deaf                        | 8                         |
| SLC26A4      | c.919-2A>G het                      | deaf                        | 4                         |
| SLC26A4      | c.919-2A>G /c.2168A>G (p.His723Arg) | deaf                        | 8                         |
| SLC26A4      | c.2168A>G (p.His723Arg) het         | deaf                        | 6                         |
| MTRNR1       | m.1555A>G hom                       | deaf                        | 11                        |
| MTRNR1       | m.1555A>G hom                       | nomal                       | 1                         |
|              | No mutations detected               | nomal                       | 9                         |
| <b>Total</b> |                                     |                             | <b>141</b>                |

<sup>a</sup> het stands for heterozygous; hom represents homozygous (hom represents homoplasmic for the m.1555A>G mutation).

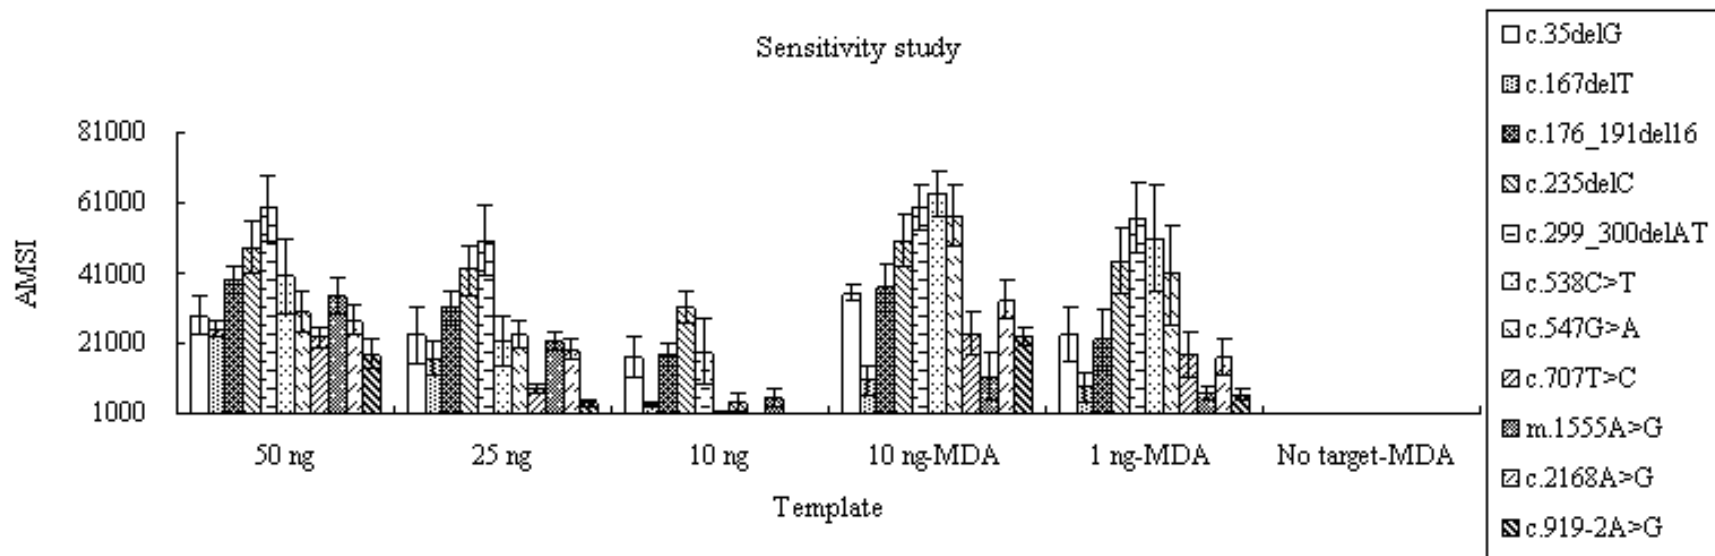

**SUPPLEMENTARY FIGURE S1.** Detection sensitivity of ASPUA in genomic DNA. 50 ng, 25 ng and 10 ng of a wild-type gDNA were assayed, respectively. 10 ng and 1 ng of the gDNA and a target-free control were amplified by multiple displacement amplification (MDA), and then the MDA products were detected by ASPUA.
